# Supplementary material for: Nanoparticle-doped large area PMMA plates with controlled optical diffusion
Source: Royal Society of Chemistry journal article supplement (doi:10.1039/c3tc00767g), 2013-01-01
Supplement: c3tc00767g.pdf [file c3tc00767g.pdf]

## Nanoparticle-doped large area PMMA plates with controlled optical diffusion

Annalisa Colombo,<sup>a</sup> Francesco Tassone,<sup>\*b</sup> Filippo Santolini,<sup>c</sup> Nunzia Contiello,<sup>c</sup> Alfredo Gambirasio<sup>d</sup> and Roberto Simonutti<sup>\*a</sup>

### Supporting Information

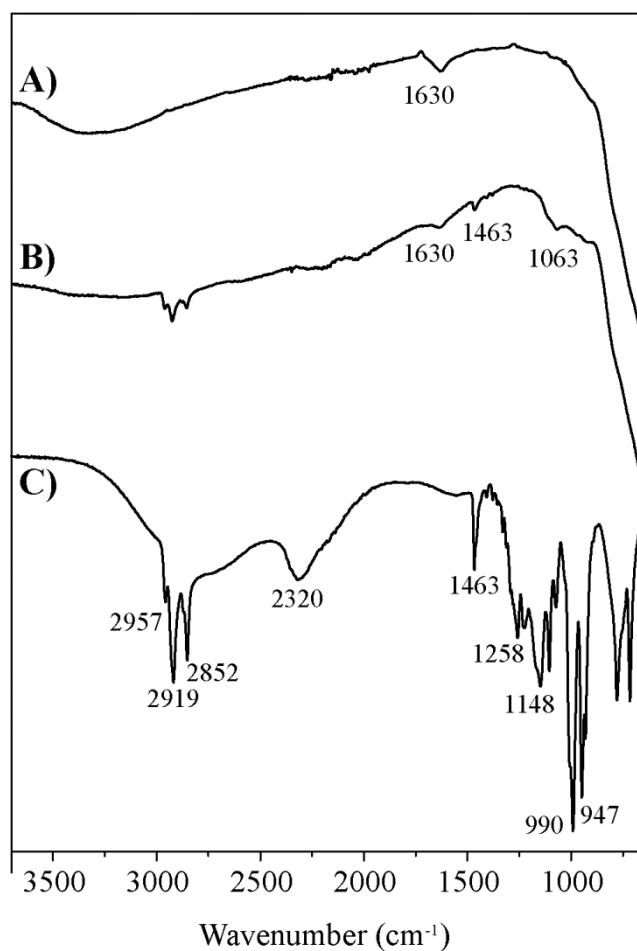

**Figure 1.** FTIR spectra of: A) P25; B) P25 modified with 1-octylphosphonic acid; C) free 1-octylphosphonic acid.

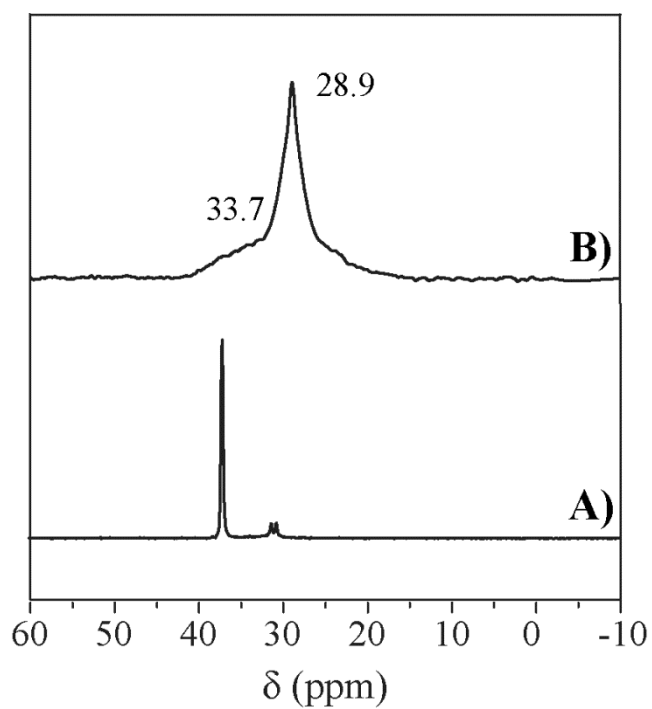

**Figure 2**  $^{31}\text{P}$  MAS NMR spectra of pure 1-octylphosphonic acid (A) and of the  $\text{TiO}_2$  nanoparticle modified with it (B).

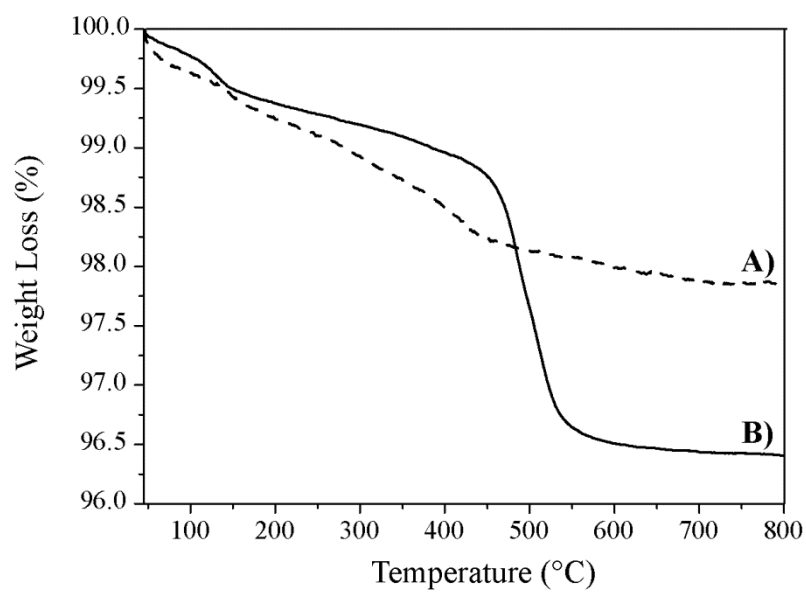

**Figure 3.** Comparison between TGA curves of commercial titania P25 (A) and the surface modified titania nanoparticles (B).

TABLE 1

Average hydrodynamic diameter of colloids in MMA measured by DLS after 3 days and 30 days since the ultrasonication process.

| Sample  | Hydrodynamic diameter (nm) |          |
|---------|----------------------------|----------|
|         | 3 Days                     | 30 Days  |
| OPA@P25 | 155 [60] <sup>a</sup>      | 150 [65] |

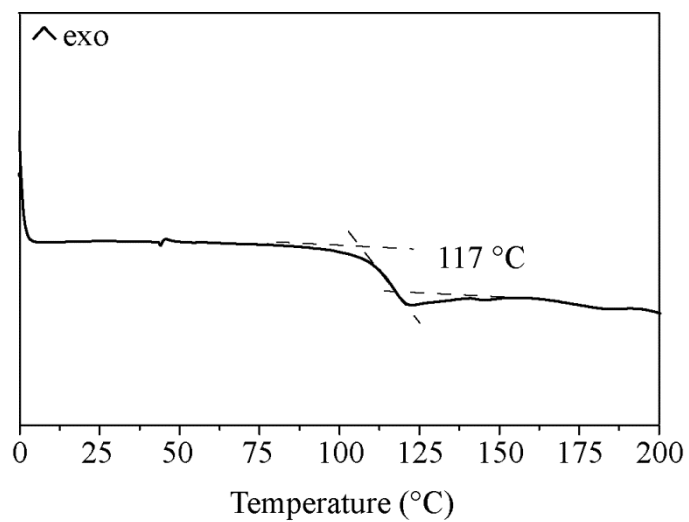

**Figure 4.** Differential Scanning Calorimetry (DSC) curve of a PMMA plate containing 90 ppm w/w TiO<sub>2</sub>. It shows a transition glass of about 117°C.
